# Supplementary material
Source: Frontiers journal article supplement (https://www.frontiersin.org/articles/281596)
Supplement: Image_5.PDF [file Image_5.PDF]

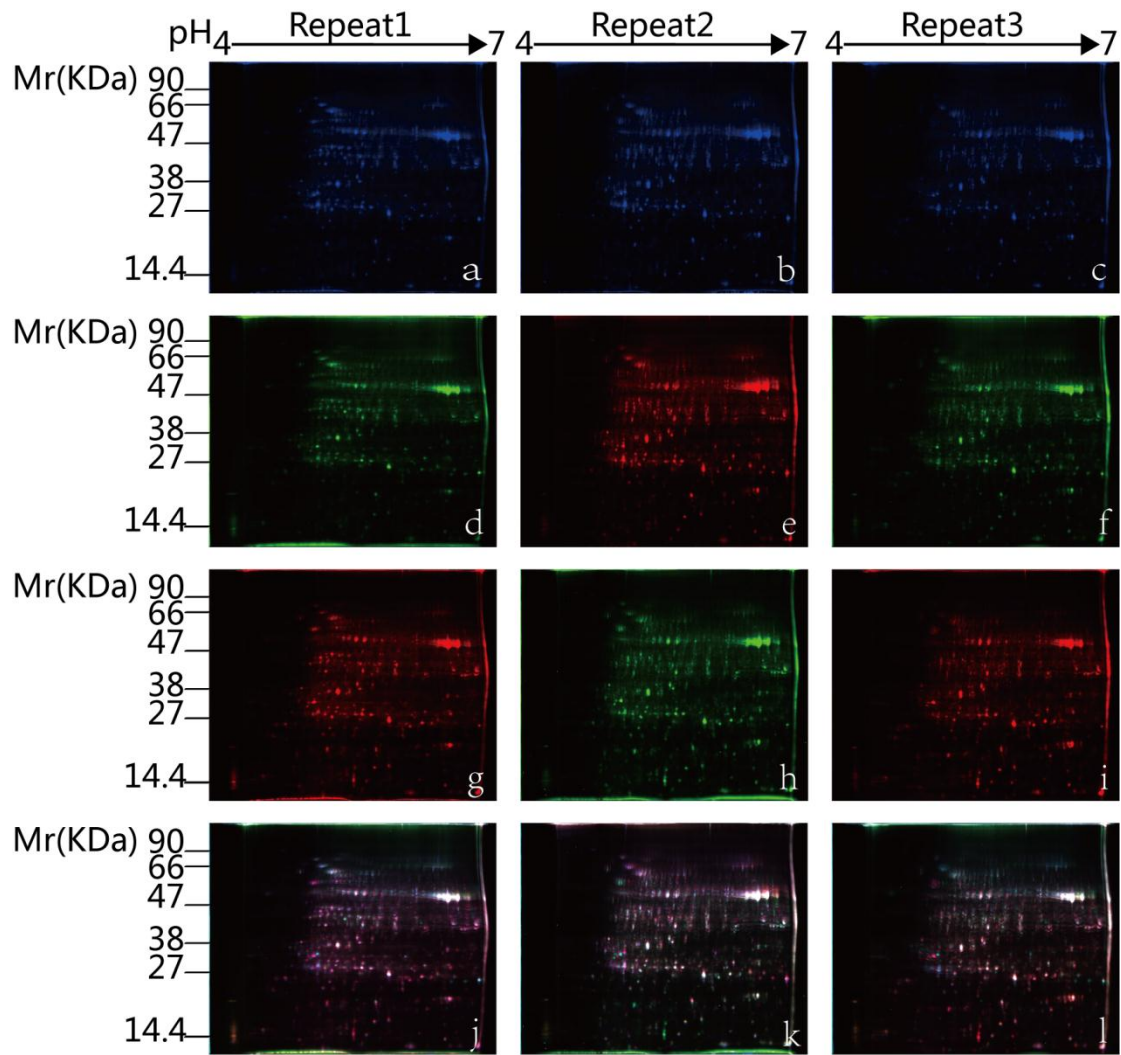

**Supplementary Figure S5. | Three biological replicates and three triplicate gels at 6 h.** Blue represents the proteins labeled by Cy2. Green represents the proteins labeled by Cy3 Red represents the proteins labeled by Cy5. a, b, c were the gels of the same amount of proteins from 02428 and Pf9279-4. d, e, f were the gels of proteins from 02428. g, h, I was the gels of proteins from Pf9279-4. j, k, l was superposition of triplicate gels, respectively.
